# Supplementary material for: Improvement of SWCNT transparent conductive films via transition metal doping
Source: Royal Society of Chemistry journal article supplement (doi:10.1039/c1cc10190k), 2011-01-01
Supplement: c1cc10190k.pdf [file c1cc10190k.pdf]

## Electronic Supplementary Information for “Improvement of SWCNT transparent conductive film properties via a transition metal doping route”

DaeSeob Shim,<sup>a</sup> Seung-Ho Jung,<sup>a</sup> Song Yi Han,<sup>b</sup> Kwonwoo Shin,<sup>b</sup> Kun-Hong Lee <sup>\*a</sup> and Jong-Hun Han<sup>\*b</sup>

### 1. Experimental set-up for SWCNT-TCF auto spray coating machine

The unique auto spray coating machine was fabricated for transparent conductive film (TCF) based on single-walled carbon nanotubes (SWCNTs). The machine can be automatically operated by the embedded program consisted of coating area, moving speed, strength of spray and bubble size. TCFs were formed on the 10 cm × 10 cm glass substrate coated by thin transparent polymers.

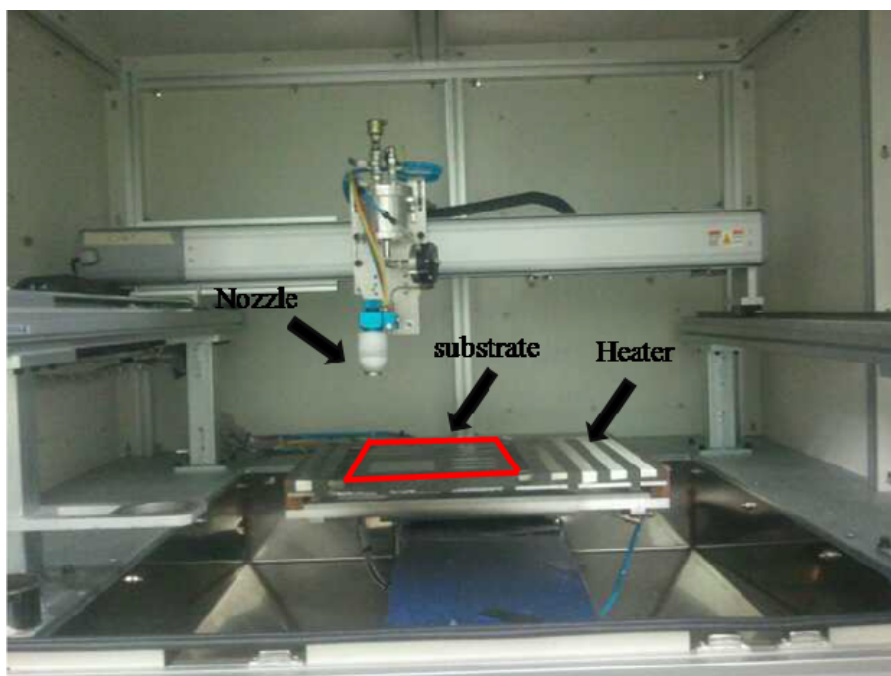

**Figure S1.** The automatic spray coating machine

## 2. Properties of SWCNTs synthesized by arc-discharged method

Table S1 shows two kinds of SWCNTs used in our research. When we used highly purified ASP-100F (hereafter hp-SWCNT) SWCNTs, high yield SWCNTs solution could be acquired after ultracentrifugation process. On the other hand, when we used thermally purified SA210 (hereafter tp-SWCNT) SWCNTs, good TCF properties could be acquired. The ratio between metallic and semiconducting SWCNTs was calculated from UV-Vis-NIR spectra. Semiconducting content in the tp-SWCNTs was higher than hp-SWCNTs as shown in Figure S2.

|          | Purity                | Post-Treatment                | Producer         |
|----------|-----------------------|-------------------------------|------------------|
| ASP-100F | 60~70 wt.% (90 vol.%) | Thermal and acid purification | Hanwha nanotech. |
| SA210    | 20~30 wt.%            | Thermal treatment             | Nano Solution    |

**Table S1.** Purity and post-treatment methods of two kinds of SWCNTs used in our research.

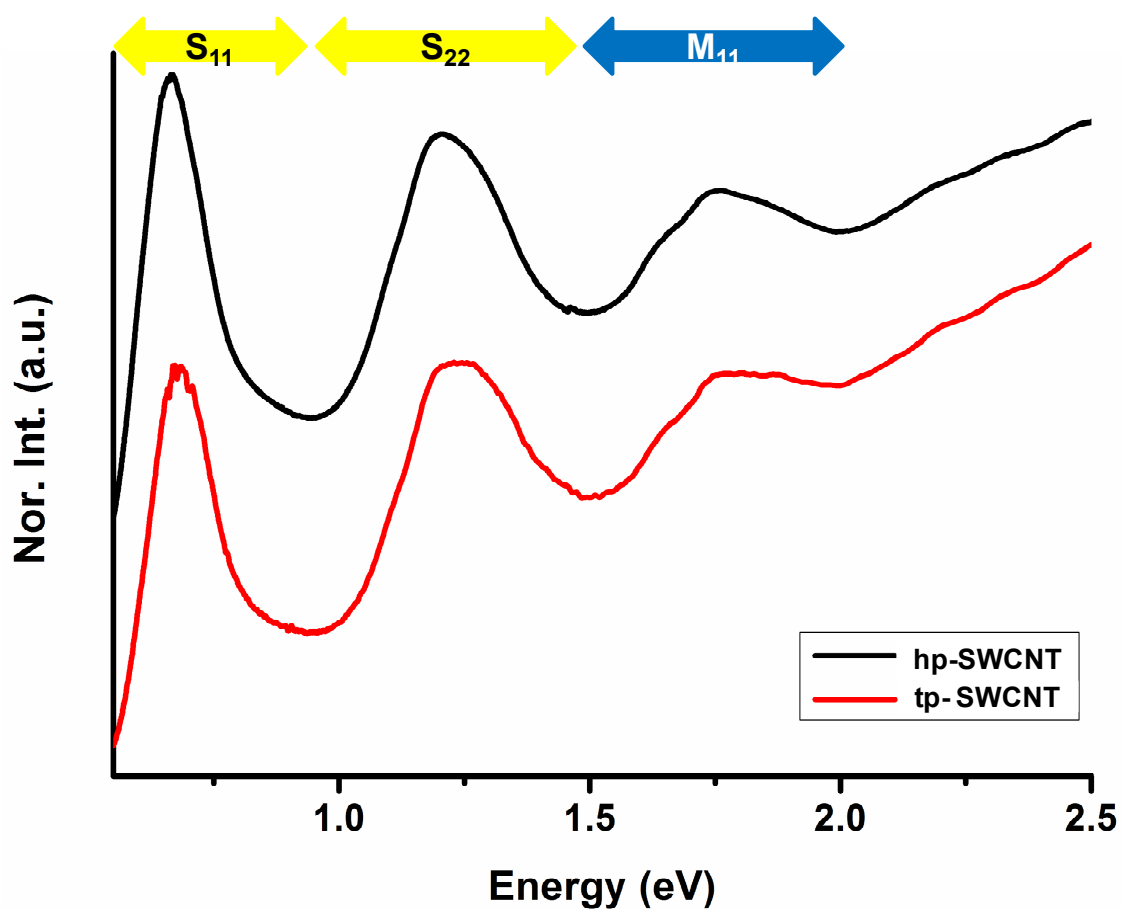

**Figure S2.** UV-Vis-nIR spectra of hp- and tp-SWCNTs; calculated (*m-*)/(*s-*) SWCNT ratio was 23.5 %/76.5 % in hp-SWCNTs and 15.3 %/84.7 % in tp-SWCNTs, respectively.

### 3. HR-TEM studies for metal doped SWCNT

The size of reduced metal particles on the SWCNTs was investigated by using HR-TEM. Increasing the concentration of Ni salt solution, the size of reduced Ni nanoparticles was increased slightly from 3 nm to 7 nm. However, the number of Ni nanoparticles on the SWCNT bundles was increased dramatically as the concentration of doping solution was increased.

In the case of 1mM Ni solution, reduced Ni nanoparticles were rarely observed. However, Ni nanoparticles of about 3 nm diameter were uniformly distributed on the surface of SWCNTs at 5 mM. The size of Ni nanoparticles was increased at 10 mM with smaller number of particles. In the case of 20 mM and 50 mM, the size of Ni nanoparticles was increased to about 7 nm diameters, and clusters of Ni nanoparticles appeared around SWCNT bundles.

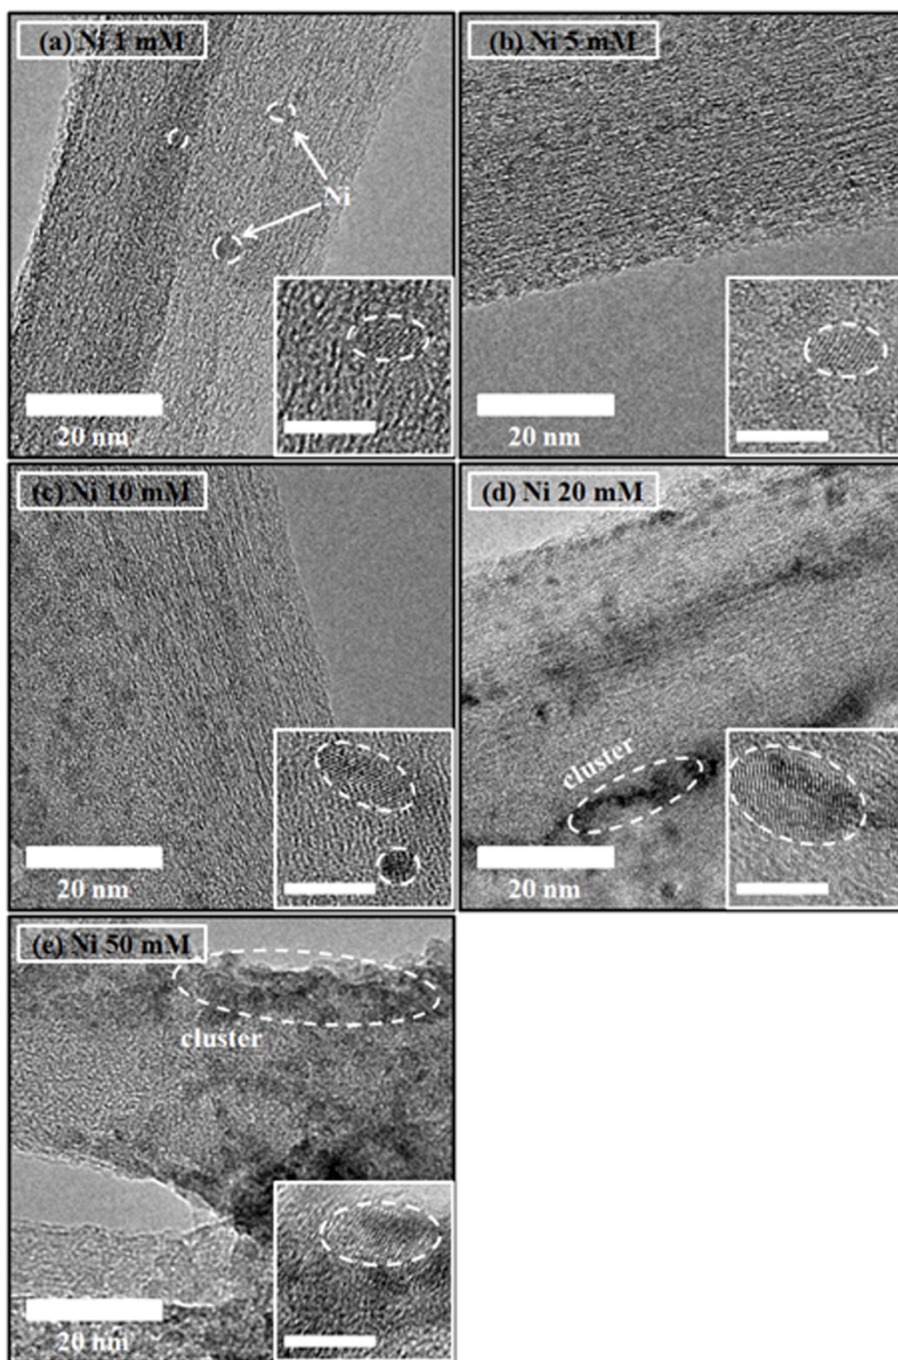

**Figure S3.** HR-TEM images of reduced Ni nanoparticles on hp-SWCNT bundles (inset scale bar is 5 nm) (a) reduced Ni nanoparticles at 1 mM of Ni solution, (b) at 5 mM of Ni solution, (c) at 10 mM of Ni solution, (d) at 20 mM of Ni solution, and (e) at 50 mM of Ni solution

#### 4. Properties of SWCNT-TCF doped with Au, Pd, Ir, Ni and Co

Doping effects on the SWCNT network were also studied by using palladium and cobalt. The properties of SWCNT networks were also affected by Palladium (Pd) and Cobalt (Co). Transmittance line and conductivity line of hp\_TCF doped with Pd and Co was similar to Ir and Ni doping line. Also tp\_TCF properties were similar to Ir and Ni doped TCF properties. In order to estimate the influence on the TCF properties by metal reduction, 3 cases of starting TCF sample was prepared.

##### (a) Gold doped SWCNT TCF

| hp-SWCNT | Au doping |              |       |              |       |              |
|----------|-----------|--------------|-------|--------------|-------|--------------|
|          | T (%)     | Rsq (ohm/sq) | T (%) | Rsq (ohm/sq) | T (%) | Rsq (ohm/sq) |
| Raw      | 96.43     | 1278.84      | 85.10 | 261.2        | 76.66 | 137.08       |
| 10 mM    | 93.93     | 349          | 83.81 | 91.9         | 73.59 | 49           |

(b) Pd doped SWCNT TCF

| hp-SWCNT | Pd doping |              |       |              |       |              |
|----------|-----------|--------------|-------|--------------|-------|--------------|
|          | T (%)     | Rsq (ohm/sq) | T (%) | Rsq (ohm/sq) | T (%) | Rsq (ohm/sq) |
| Raw      | 96.43     | 1278.84      | 85.10 | 261.2        | 76.66 | 137.08       |
| 1 mM     | 95.48     | 729          | 85.73 | 193          | 76.76 | 98.8         |
| 5 mM     | 95.63     | 750          | 85.34 | 174.5        | 75.84 | 92.5         |
| 10 mM    | 95.07     | 698          | 84.94 | 166.5        | 76    | 99.1         |
| 20 mM    | 95.45     | 733          | 83.22 | 160.5        | 76    | 99.5         |
| 50 mM    | 94.84     | 785          | 82.12 | 136.5        | 74.42 | 85.9         |

(c) Ir doped SWCNT TCF

| hp-SWCNT | Ir doping |              |       |              |       |              |
|----------|-----------|--------------|-------|--------------|-------|--------------|
|          | T (%)     | Rsq (ohm/sq) | T (%) | Rsq (ohm/sq) | T (%) | Rsq (ohm/sq) |
| Raw      | 96.43     | 1278.84      | 85.10 | 261.2        | 76.66 | 137.08       |
| 1 mM     | 95.24     | 665          | 84.85 | 181.5        | 74.7  | 86.6         |
| 5 mM     | 94.97     | 563          | 83.85 | 155          | 74.41 | 84.5         |
| 10 mM    | 94.2      | 489          | 83.1  | 117.3        | 73.26 | 64.2         |
| 20 mM    | 94.62     | 544          | 84.36 | 137.5        | 75.11 | 78.5         |
| 50 mM    | 94.26     | 621          | 83.09 | 133.3        | 74.06 | 73.3         |

(d) Ni doped SWCNT TCF

| hp-SWCNT | Ni doping |              |       |              |       |              |
|----------|-----------|--------------|-------|--------------|-------|--------------|
|          | T (%)     | Rsq (ohm/sq) | T (%) | Rsq (ohm/sq) | T (%) | Rsq (ohm/sq) |
| Raw      | 96.43     | 1278.84      | 85.10 | 261.2        | 76.66 | 137.08       |
| 1 mM     | 94.88     | 747          | 85.11 | 178          | 74.38 | 90.4         |
| 5 mM     | 94.87     | 747          | 84.66 | 149          | 74.4  | 75           |
| 10 mM    | 94.7      | 726          | 83.81 | 146.6        | 75.24 | 89.7         |
| 20 mM    | 94.22     | 712          | 83.64 | 174.5        | 74.15 | 85.9         |
| 50 mM    | 92.76     | 834          | 82.25 | 182.5        | 74.06 | 99.1         |

(e) Co doped SWCNT TCF

| hp-SWCNT | Co doping |              |       |              |       |              |
|----------|-----------|--------------|-------|--------------|-------|--------------|
|          | T (%)     | Rsq (ohm/sq) | T (%) | Rsq (ohm/sq) | T (%) | Rsq (ohm/sq) |
| Raw      | 96.43     | 1278.84      | 85.10 | 261.2        | 76.66 | 137.08       |
| 1 mM     | 95.27     | 698          | 85.24 | 216          | 75.52 | 105.4        |
| 5 mM     | 95.57     | 688          | 85.82 | 195.1        | 75.3  | 86.2         |
| 10 mM    | 94.7      | 593          | 84.51 | 158.1        | 75.6  | 82.7         |
| 20 mM    | 94.92     | 740          | 83.24 | 153.6        | 74.94 | 84.1         |
| 50 mM    | 93.94     | 719          | 82.92 | 152.5        | 73.9  | 87.9         |



(f) Gold doped SWCNT TCF

| tp-SWCNT | Au doping |              |       |              |       |              |
|----------|-----------|--------------|-------|--------------|-------|--------------|
|          | T (%)     | Rsq (ohm/sq) | T (%) | Rsq (ohm/sq) | T (%) | Rsq (ohm/sq) |
| Raw      | 98.20     | 1805.67      | 94.10 | 767.33       | 83.29 | 277.67       |
| 10 mM    | 96.73     | 687          | 93.08 | 270          | 81.09 | 70.5         |

(g) Pd doped SWCNT TCF

| tp-SWCNT | Pd doping |              |       |              |       |              |
|----------|-----------|--------------|-------|--------------|-------|--------------|
|          | T (%)     | Rsq (ohm/sq) | T (%) | Rsq (ohm/sq) | T (%) | Rsq (ohm/sq) |
| Raw      | 98.20     | 1805.67      | 94.10 | 767.33       | 83.29 | 277.67       |
| 1 mM     | 98.21     | 1344         | 93.67 | 399          | 82.72 | 139.3        |
| 5 mM     | 98.07     | 1201         | 94.02 | 363          | 82.49 | 129          |
| 10 mM    | 98        | 1417         | 93.36 | 384          | 83.17 | 129.1        |
| 20 mM    | 97.67     | 1295         | 93.05 | 415          | 82.15 | 126.7        |
| 50 mM    | 97.06     | 1455         | 92.27 | 383          | 81.54 | 116.6        |

(h) Ir doped SWCNT TCF

| tp-SWCNT | Ir doping |              |       |              |       |              |
|----------|-----------|--------------|-------|--------------|-------|--------------|
|          | T (%)     | Rsq (ohm/sq) | T (%) | Rsq (ohm/sq) | T (%) | Rsq (ohm/sq) |
| Raw      | 98.20     | 1805.67      | 94.10 | 767.33       | 83.29 | 277.67       |
| 1 mM     | 98.08     | 1162         | 93.62 | 385          | 83.22 | 142.4        |
| 5 mM     | 98.05     | 1117         | 92.91 | 328          | 82.44 | 123.5        |
| 10 mM    | 97.26     | 1110         | 92.3  | 295          | 81.75 | 101.2        |
| 20 mM    | 97.57     | 1173         | 92.39 | 326          | 83    | 124.9        |
| 50 mM    | 96.56     | 1138         | 92.2  | 372          | 80.62 | 111.7        |

(i) Ni doped SWCNT TCF

| tp-SWCNT | Ni doping |              |       |              |       |              |
|----------|-----------|--------------|-------|--------------|-------|--------------|
|          | T (%)     | Rsq (ohm/sq) | T (%) | Rsq (ohm/sq) | T (%) | Rsq (ohm/sq) |
| Raw      | 98.20     | 1805.67      | 94.10 | 767.33       | 83.29 | 277.67       |
| 1 mM     | 97.55     | 1044         | 93.85 | 406          | 83    | 113.4        |
| 5 mM     | 97.6      | 1138         | 93.48 | 313          | 82.89 | 119.7        |
| 10 mM    | 97.75     | 1281         | 93.6  | 358          | 83.02 | 113.8        |
| 20 mM    | 97.65     | 1553         | 94.03 | 488          | 83.35 | 124.9        |
| 50 mM    | 97.42     | 1738         | 93.05 | 550          | 81.08 | 116          |

(j) Co doped SWCNT TCF

| tp-SWCNT | Co doping |              |       |              |       |              |
|----------|-----------|--------------|-------|--------------|-------|--------------|
|          | T (%)     | Rsq (ohm/sq) | T (%) | Rsq (ohm/sq) | T (%) | Rsq (ohm/sq) |
| Raw      | 98.20     | 1805.67      | 94.10 | 767.33       | 83.29 | 277.67       |
| 1 mM     | 97.62     | 1187         | 93.8  | 393          | 83.2  | 127.7        |
| 5 mM     | 97.82     | 1295         | 93.5  | 364          | 83.24 | 127          |
| 10 mM    | 98        | 1351         | 93.27 | 344          | 83.44 | 122.2        |
| 20 mM    | 98.01     | 1284         | 93.24 | 336          | 82.35 | 111.3        |
| 50 mM    | 96.41     | 1138         | 92.15 | 455          | 80.92 | 132.3        |

**Table S2.** Data sheet of transition metal doping on the SWCNT TCF: (a-e) hp-SWCNT based TCF properties, (f-j) tp-SWCNT based TCF properties.
